# Supplementary material for: Substitution of allylic acetates with sodium para-toluenesulfinate in aqueous media using allylpalladium chloride dimer and a water-soluble ligand as the catalytic system; electrospray ionisation mass spectrometry analysis
Source: Royal Society of Chemistry journal article supplement (doi:10.1039/b613562e), 2006-11-16

## Supporting information

### Substitution of allylic acetates with sodium *p*-toluenesulfinate in aqueous media using allylpalladium chloride dimer and a water-soluble ligand as the catalytic system; electrospray ionisation mass spectrometry analysis

Carole Chevrin,<sup>a</sup> Jean Le Bras,<sup>a</sup> Anna Roglans,<sup>b</sup> Dominique Harakat,<sup>a</sup> Jacques Muzart<sup>a1</sup>

<sup>a</sup>Unité Mixte de Recherche 6519 “Réactions Sélectives et Applications”, Boîte n° 44, CNRS-Université de Reims Champagne-Ardenne, BP 1039, 51687 Reims cedex 2, France.

<sup>b</sup>Department of Chemistry, Universitat de Girona, Campus de Montilivi, 17071 Girona, Spain

**Figure S1.** ESI(+)-MS spectrum of **7**. Experimental conditions: **7** in a mixture of H<sub>2</sub>O, MeOH and THF (1:1:0.2).

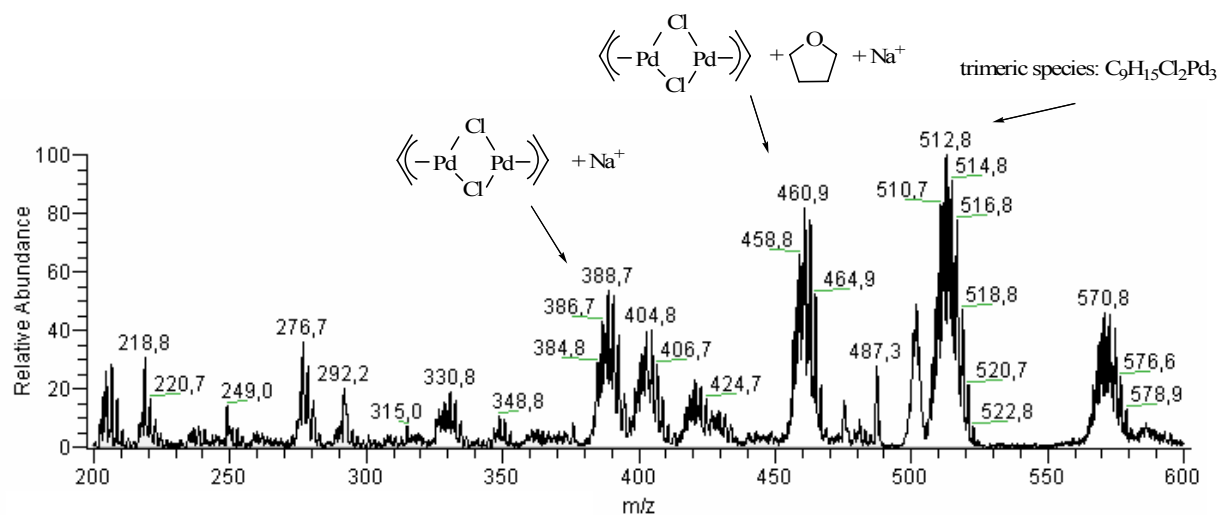

<sup>1</sup> Tel.: +33-3-2691-3237; fax: +33-3-2691-3166; e-mail: jacques.muzart@univ-reims.fr

Corresponding expanded ESI(+)-MS spectra of above detected species and their theoretical spectra.

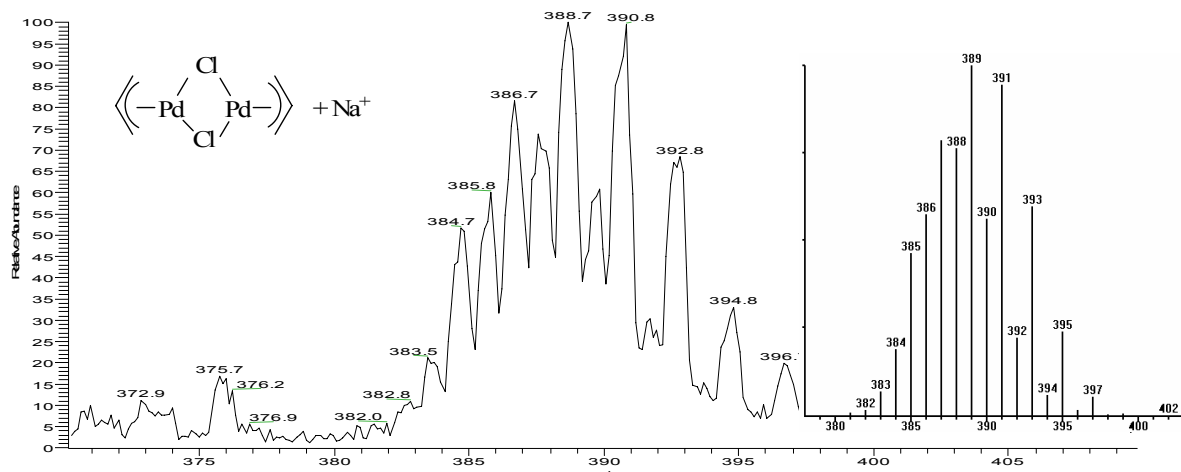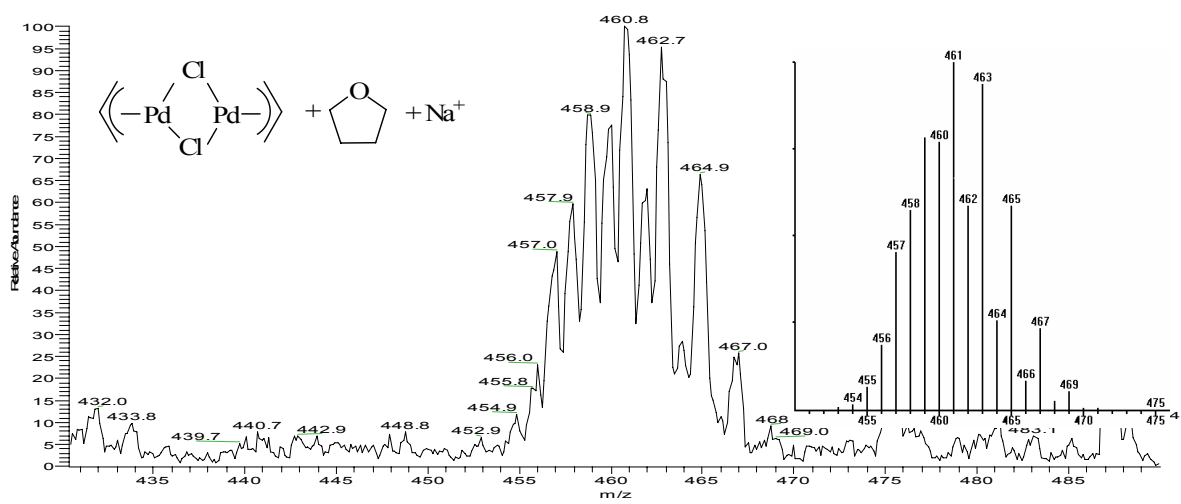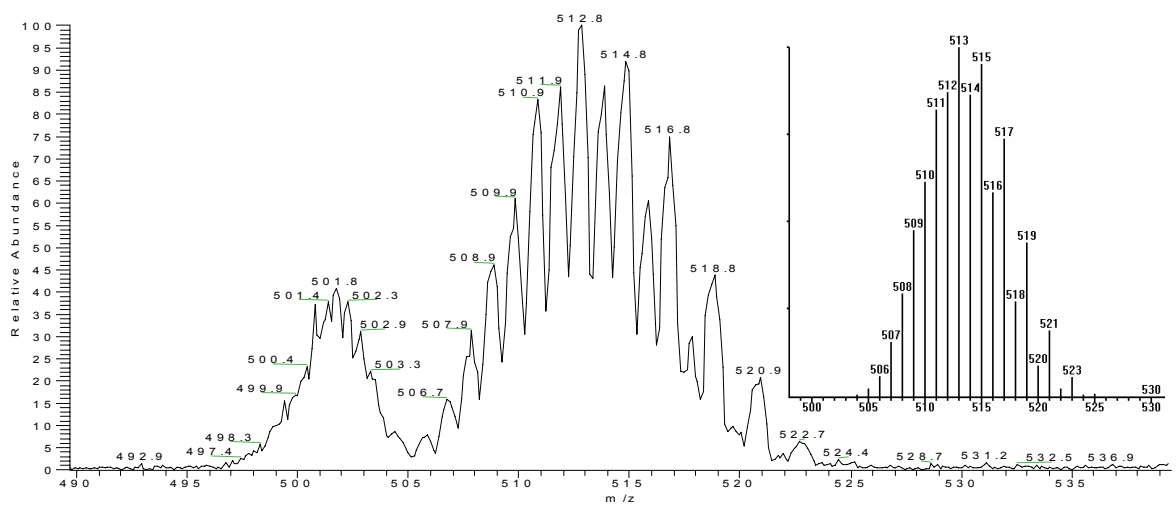

**Figure S2.** ESI(+)-MS spectrum of L<sub>H</sub>. Experimental conditions: L<sub>H</sub> in a mixture of H<sub>2</sub>O and MeOH (1:1).

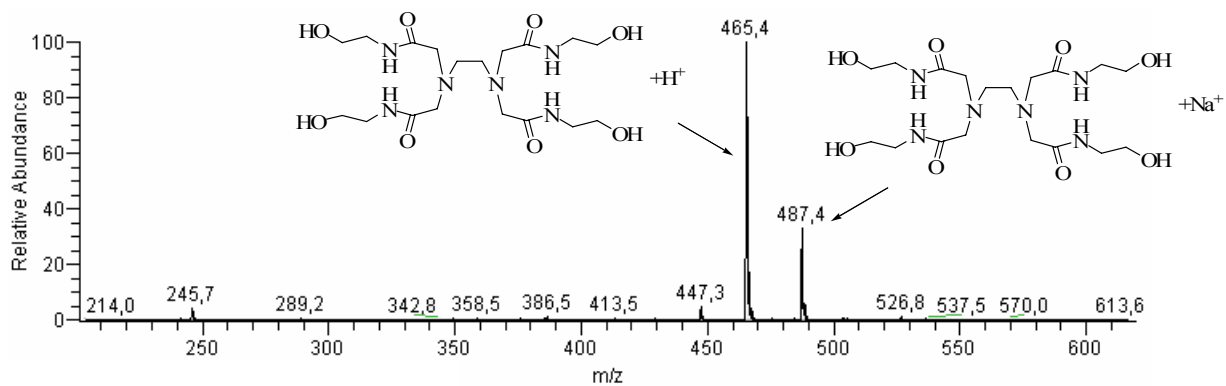

Corresponding expanded ESI(+)-MS spectra of above detected species and their theoretical spectra.

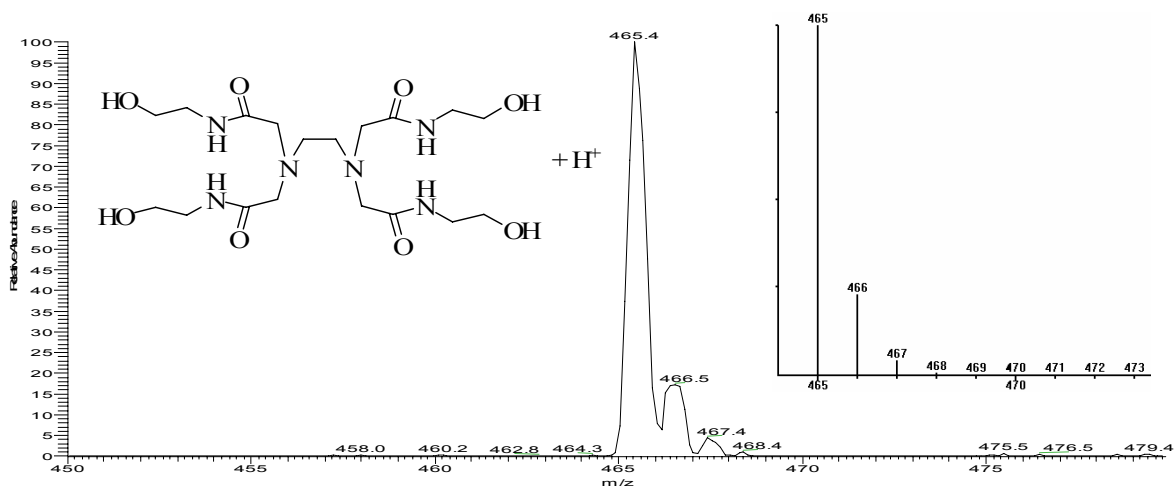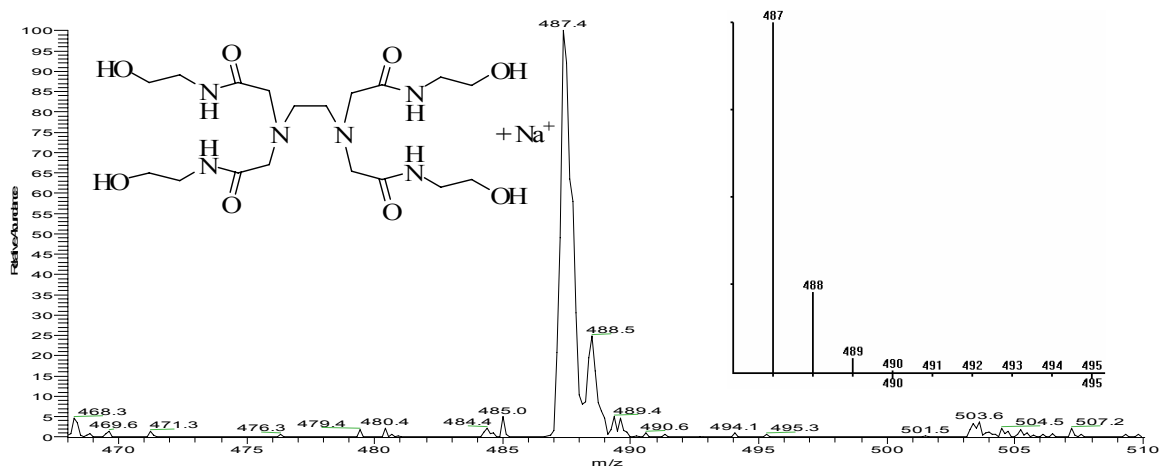

**Figure S3.** ESI(+)-MS spectrum of **7** + L<sub>H</sub>. <sup>a</sup>Experimental conditions: **7**, L<sub>H</sub> (2 equiv.) in a mixture of H<sub>2</sub>O and MeOH (1:1).

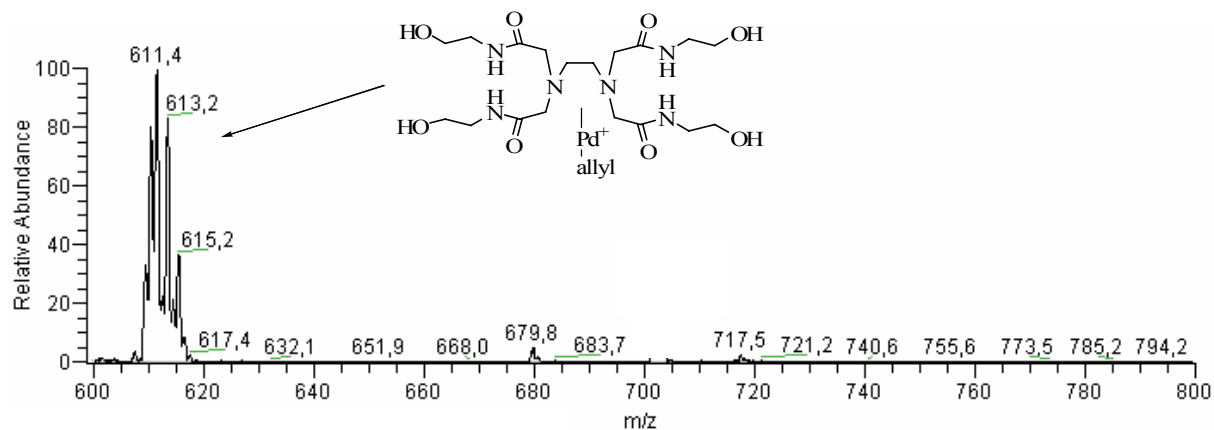

Corresponding expanded ESI(+)-MS spectra of above detected species and their theoretical spectra.

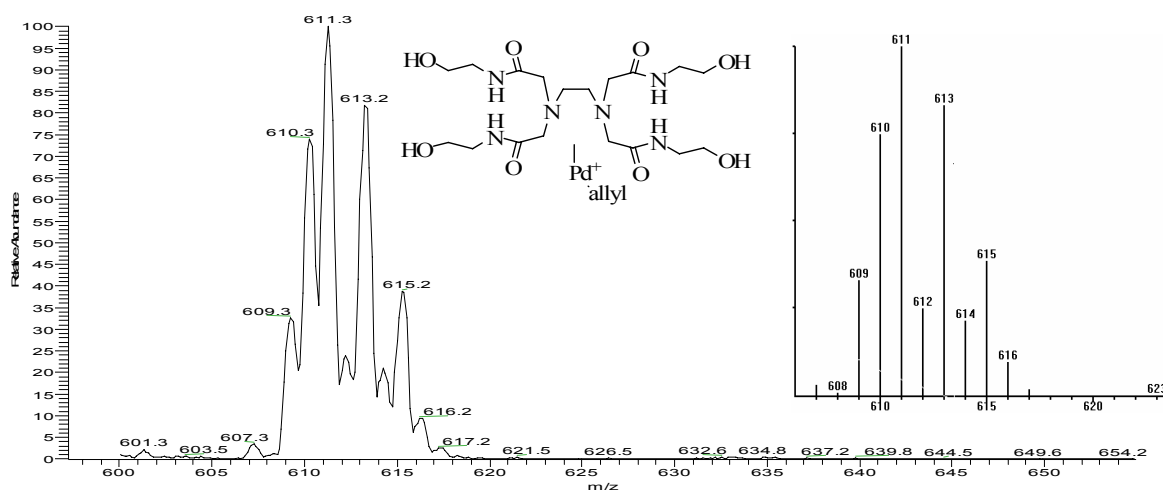

**Figure S4.** ESI(+)-MS spectrum of the aqueous phase after extraction of the crude mixture with CH<sub>2</sub>Cl<sub>2</sub>. Experimental conditions: As in figure 3 for 24 h followed by extraction with CH<sub>2</sub>Cl<sub>2</sub>.

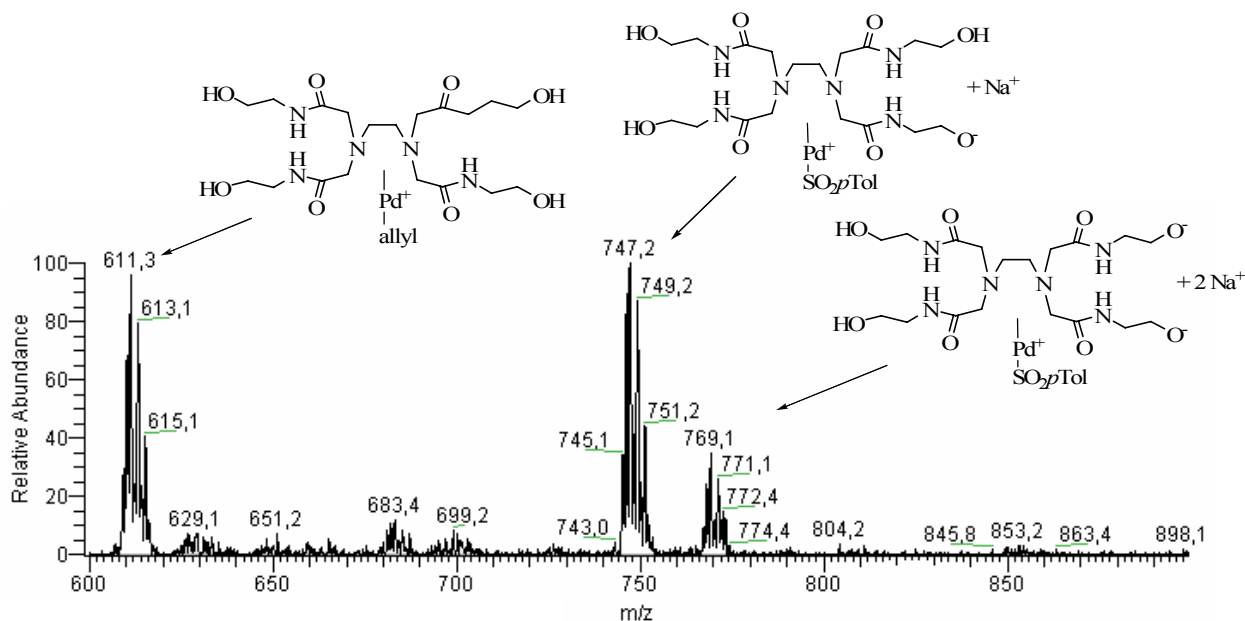

Corresponding expanded ESI(+)-MS spectra of above detected species and their theoretical spectra.

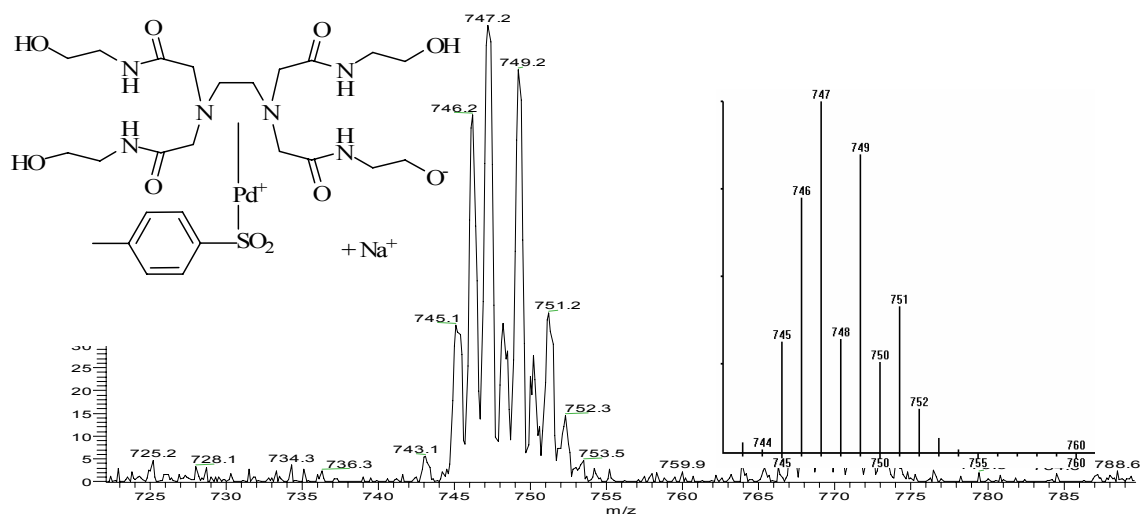

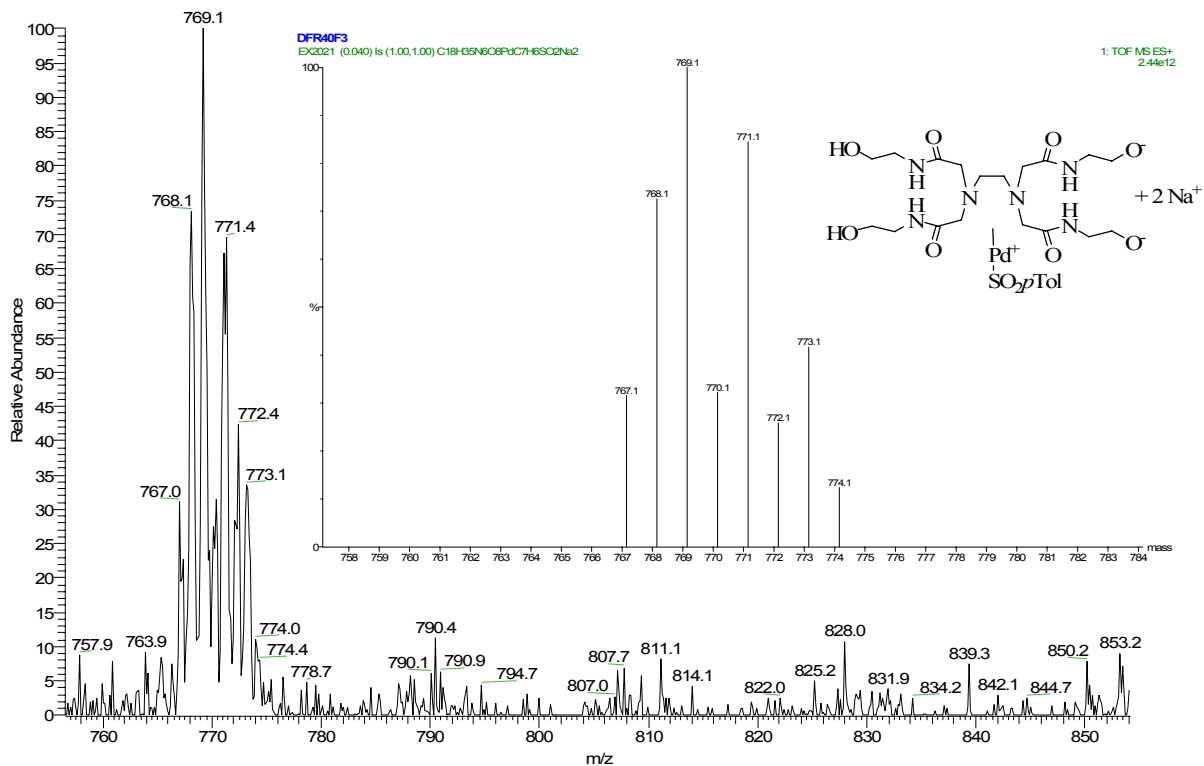

**Figure S5.** ESI(+)-MS spectrum of the crude mixture using  $K_2CO_3$  and  $CH_2(COMe)_2$ . Experimental conditions: **7**,  $L_H$  (2 equiv.), **2** (2 equiv.),  $K_2CO_3$  (4 equiv.),  $CH_2(COMe)_2$  (4 equiv.),  $H_2O/MeOH$  (1:1),  $50^\circ C$ , 1 h.

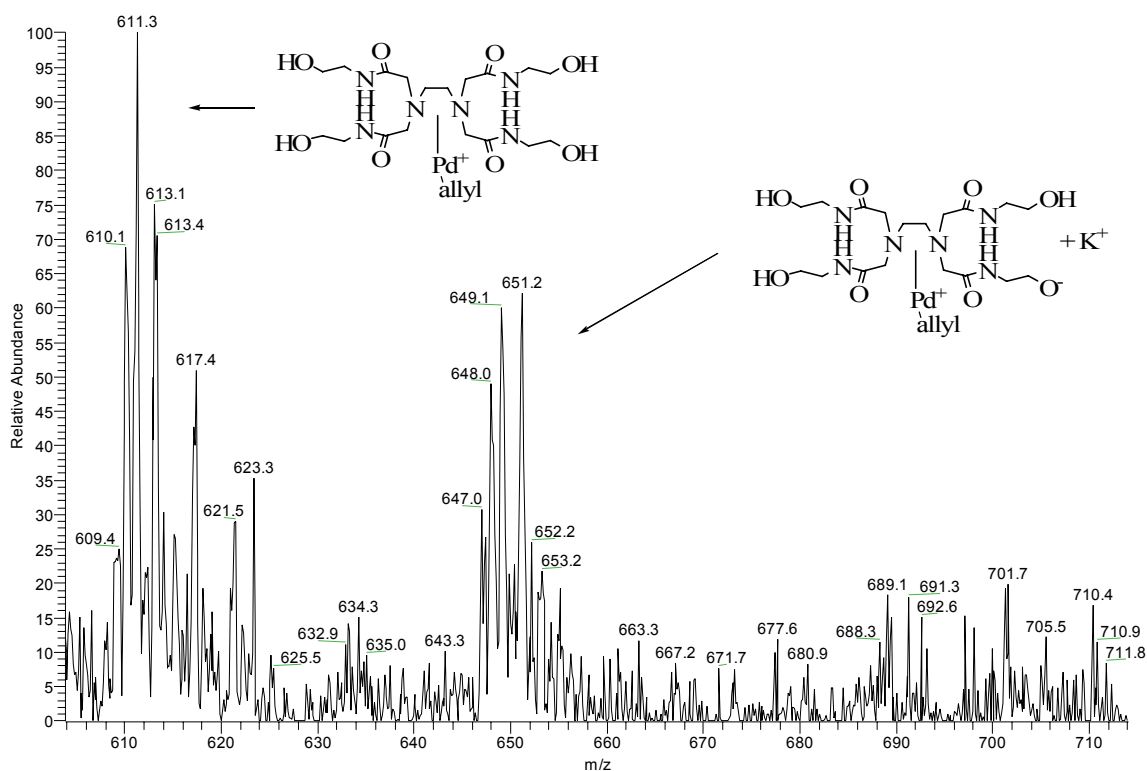

Corresponding expanded ESI(+)-MS spectra of above detected species and their theoretical spectra.

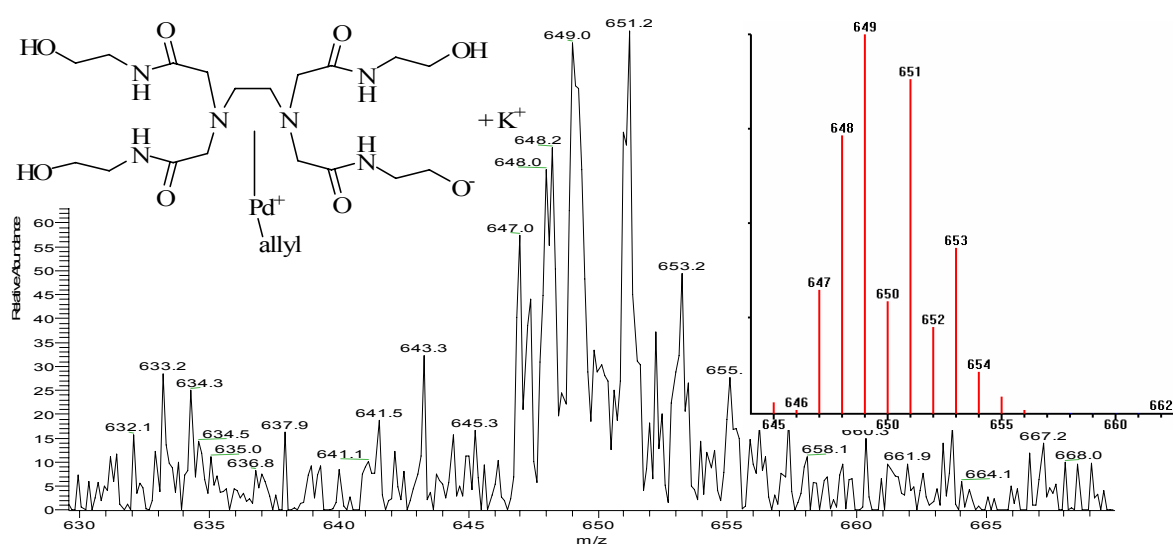

**Figure S6.** ESI(+)-MS spectrum of the crude mixture using  $\text{NaCH}(\text{COMe})_2$ . Experimental conditions: **7**,  $\text{L}_\text{H}$  (2 equiv.), **2** (2 equiv.),  $\text{NaCH}(\text{COMe})_2$  (4 equiv.),  $\text{H}_2\text{O}/\text{MeOH}$  (1:1),  $50^\circ\text{C}$ , 1 h.

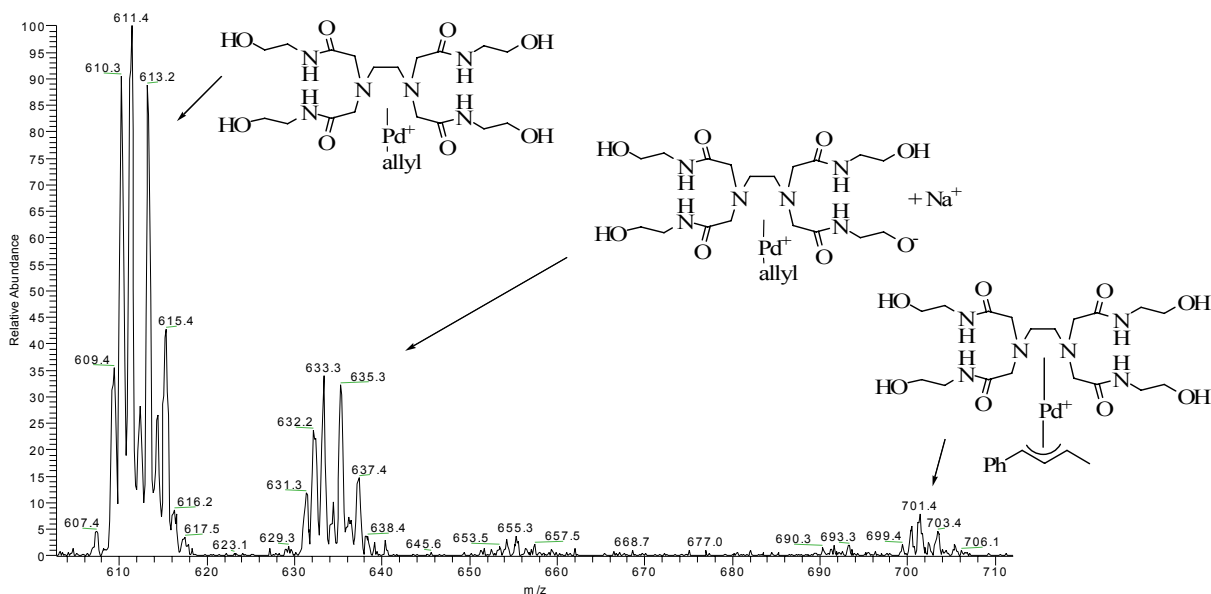

Corresponding expanded ESI(+)-MS spectra of above detected species and their theoretical spectra.

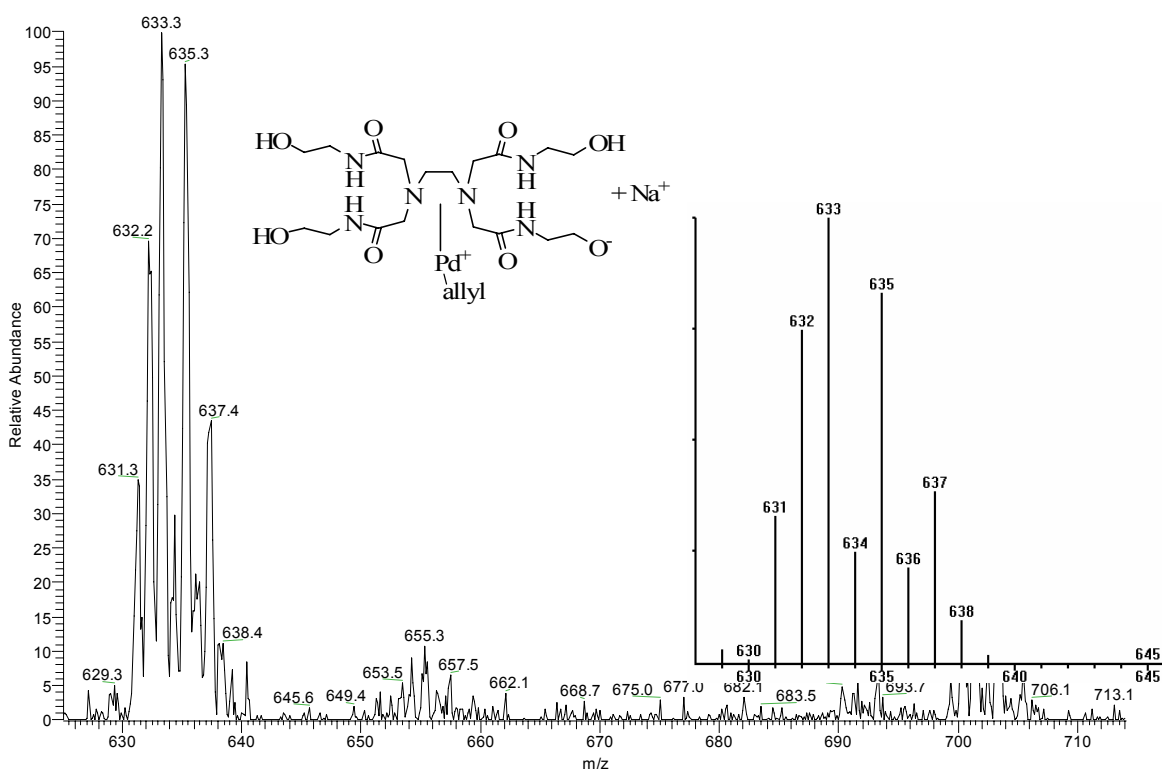



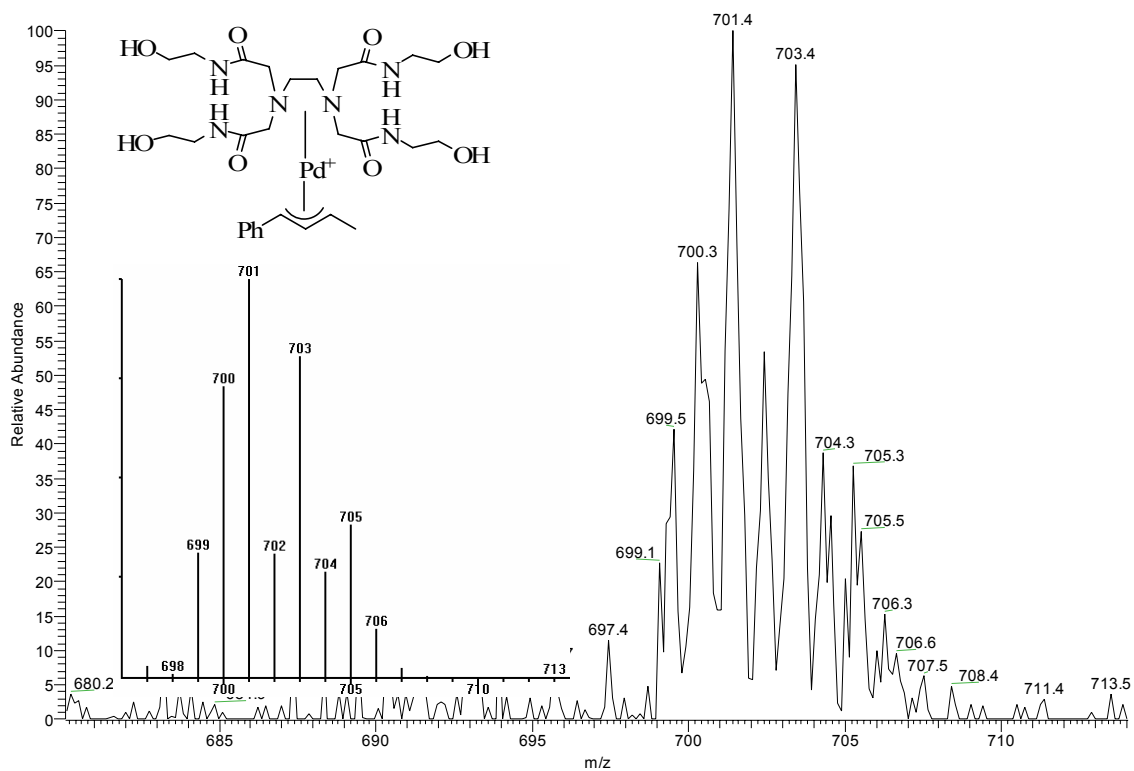

Supplement: b613562e.pdf [file b613562e.pdf]
